# Supplementary material for: A Countrywide Survey in Saudi Arabia Regarding the Knowledge and Attitude of Health Care Professionals about Coronavirus Disease (COVID-19)
Source: PubMed Central journal article supplement (PMC7600160; doi:10.3390/ijerph17207415), 2020-10-12
Supplement: ijerph-17-07415-s001.pdf [file ijerph-17-07415-s001.pdf]

**Supplementary Table:** Frequency distribution of knowledge and attitude scores among the independent variables.

| Variable                               | Knowledge |            |            | Attitude |            |            |
|----------------------------------------|-----------|------------|------------|----------|------------|------------|
|                                        | Poor      | Moderate   | Good       | Poor     | Moderate   | Good       |
| <b>Age</b>                             |           |            |            |          |            |            |
| 20–30 Years                            | 4 (1.1)   | 232 (62.5) | 135 (36.4) | 6 (1.6)  | 241 (65)   | 124 (33.4) |
| 31–40 Years                            | 4 (0.9)   | 215 (47.4) | 235 (51.8) | 13 (2.9) | 291 (64.1) | 150 (33)   |
| 41–50 Years                            | 0 (0)     | 66 (43.7)  | 85 (56.3)  | 3 (2)    | 97 (64.2)  | 51 (33.8)  |
| ≥ 51 Years                             | 0 (0)     | 18 (28.1)  | 46 (71.9)  | 2 (3.1)  | 35 (54.7)  | 27 (42.2)  |
| <b>Gender</b>                          |           |            |            |          |            |            |
| Male                                   | 3 (0.9)   | 137 (40.4) | 199 (58.7) | 14 (4.1) | 203 (59.9) | 122 (36)   |
| Female                                 | 5 (0.7)   | 394 (56.2) | 302 (43.1) | 10 (1.4) | 461 (65.8) | 230 (32.8) |
| <b>Nationality</b>                     |           |            |            |          |            |            |
| Saudi                                  | 7 (1.1)   | 358 (56.4) | 270 (42.5) | 7 (1.1)  | 406 (63.9) | 222 (35)   |
| Non-Saudi                              | 1 (0.2)   | 173 (42.7) | 231 (57)   | 17 (4.2) | 258 (63.7) | 130 (32.1) |
| <b>Region of Saudi Arabia</b>          |           |            |            |          |            |            |
| Central                                | 3 (1)     | 141 (47.5) | 153 (51.5) | 11 (3.7) | 168 (56.6) | 118 (39.7) |
| Eastern                                | 0 (0)     | 24 (46.2)  | 28 (53.8)  | 0 (0)    | 35 (67.3)  | 17 (32.7)  |
| Western                                | 1 (0.4)   | 118 (52.7) | 105 (46.9) | 3 (1.3)  | 149 (66.5) | 72 (32.1)  |
| Northern                               | 3 (1)     | 142 (48.8) | 146 (50.2) | 8 (2.7)  | 192 (66)   | 91 (31.3)  |
| Southern                               | 1 (0.6)   | 106 (60.2) | 69 (39.2)  | 2 (1.1)  | 120 (68.2) | 54 (30.7)  |
| <b>Educational Level</b>               |           |            |            |          |            |            |
| Intern                                 | 2 (2.8)   | 43 (60.6)  | 26 (36.6)  | 2 (2.8)  | 47 (66.2)  | 22 (31)    |
| Diploma / Associate College            | 5 (1.9)   | 165 (61.3) | 99 (36.8)  | 1 (0.4)  | 179 (66.5) | 89 (33.1)  |
| Bachelor's degree                      | 1 (0.2)   | 253 (52.3) | 230 (47.5) | 12 (2.5) | 301 (62.2) | 171 (35.3) |
| Master's Degree                        | 0 (0)     | 57 (41.3)  | 81 (58.7)  | 5 (3.6)  | 95 (68.8)  | 38 (27.5)  |
| Doctorate / PhD                        | 0 (0)     | 13 (16.7)  | 65 (83.3)  | 4 (5.1)  | 42 (53.8)  | 32 (41)    |
| <b>Work Experience</b>                 |           |            |            |          |            |            |
| 1–3 Years                              | 2 (0.8)   | 151 (59.2) | 102 (40)   | 2 (0.8)  | 174 (68.2) | 79 (31)    |
| 4–6 Years                              | 1 (0.6)   | 91 (54.5)  | 75 (44.9)  | 8 (4.8)  | 111 (66.5) | 48 (28.7)  |
| 7–10 Years                             | 3 (1.4)   | 122 (56)   | 93 (42.7)  | 4 (1.8)  | 135 (61.9) | 79 (36.2)  |
| > 10 Years                             | 2 (0.5)   | 167 (41.8) | 231 (57.8) | 10 (2.5) | 244 (61)   | 146 (36.5) |
| <b>Nature of Organization</b>          |           |            |            |          |            |            |
| Government                             | 8 (0.8)   | 495 (50.8) | 472 (48.4) | 20 (2.1) | 623 (63.9) | 332 (34.1) |
| Private                                | 0 (0)     | 36 (55.4)  | 29 (44.6)  | 4 (6.2)  | 41 (63.1)  | 20 (30.8)  |
| <b>Type of Work Setup</b>              |           |            |            |          |            |            |
| Primary Health Centre                  | 2 (1.3)   | 80 (51.6)  | 73 (47.1)  | 3 (1.9)  | 104 (67.1) | 48 (31)    |
| Regional Hospital                      | 5 (1)     | 272 (53.8) | 229 (45.3) | 6 (1.2)  | 312 (61.7) | 188 (37.2) |
| Specialized Hospital                   | 1 (0.5)   | 100 (50.8) | 96 (48.7)  | 4 (2)    | 141 (71.6) | 52 (26.4)  |
| Military Hospital                      | 0 (0)     | 19 (42.2)  | 26 (57.8)  | 0 (0)    | 26 (57.8)  | 19 (42.2)  |
| Private Clinic                         | 0 (0)     | 12 (52.2)  | 11 (47.8)  | 1 (4.3)  | 13 (56.5)  | 9 (39.1)   |
| Private Hospital                       | 0 (0)     | 17 (48.6)  | 18 (51.4)  | 3 (8.6)  | 21 (60)    | 11 (31.4)  |
| University health centre               | 0 (0)     | 31 (39.2)  | 48 (60.8)  | 7 (8.9)  | 47 (59.5)  | 25 (31.6)  |
| <b>Number of Source of Information</b> |           |            |            |          |            |            |
| 1                                      | 5 (0.8)   | 322 (54)   | 269 (45.1) | 11 (1.8) | 384 (64.4) | 201 (33.7) |
| 2                                      | 3 (1)     | 143 (50.1) | 139 (48.7) | 7 (2.4)  | 180 (63.1) | 98 (34.3)  |
| >2                                     | 0 (0)     | 66 (41.5)  | 93 (58.5)  | 6 (3.7)  | 100 (62.8) | 53 (33.3)  |
